# Supplementary material for: Comparison between SnSb–C and Sn–C composites as anode materials for lithium-ion batteries
Source: Royal Society of Chemistry journal article supplement (doi:10.1039/c4ra12304b), 2014-01-01
Supplement: c4ra12304b1.pdf [file c4ra12304b1.pdf]

## Supplementary Information

### Comparison between SnSb-C and Sn-C composites as anode materials for Li-ion batteries

Long Fan <sup>a</sup>, Jingjing Zhang <sup>a</sup>, Yongchun Zhu <sup>a, \*</sup>, Xiaobo Zhu <sup>a</sup>, Jianwen Liang <sup>a</sup>, Lili Wang <sup>a</sup>, and Yitai Qian <sup>a, b, \*</sup>

*a* Department of Chemistry, University of Science and Technology of China, Hefei, Anhui, 230026, PR China

*b* School of Chemistry and Chemical Engineering, Shandong University, Jinan 250100, PR China

\*Corresponding author: Yong-Chun Zhu, E-mail: [yhzhu@ustc.edu.cn](mailto:yhzhu@ustc.edu.cn);

Yi-Tai Qian, E-mail: [ytqian@ustc.edu.cn](mailto:ytqian@ustc.edu.cn)

#### Synthesis of SnO<sub>2</sub> precursor

The SnO<sub>2</sub> precursor was prepared by a hydrothermal method. In a typical synthesis, 2 mmol SnCl<sub>4</sub>·5H<sub>2</sub>O were added to a 40 mL mixture of ethanol and water (1/1; v/v) under magnetic stirring. When the mixture was dispersed to form a homogeneous solution, 8ml 1M NaOH solution was dropwise added to the above solution under magnetic stirring. After 1h stirring, the mixture was transferred into a Teflon-lined stainless steel autoclave with a capacity of 60 mL for hydrothermal treatment at 180 °C for 24 h. Finally, the product was collected and washed with deionized water and ethanol for several times and then dried under vacuum at 50 °C for 12 hour.

## **SnO<sub>2</sub> nanocomposite precursor characterization**

**Figure S1.** (a) XRD pattern, (b) SEM and (c) TEM image of the SnO<sub>2</sub> nanoparticles.

Fig. S1a show the XRD pattern of the SnO<sub>2</sub> nanoparticles precursor. All the identified diffraction peaks can be assigned to the tetragonal phase of cassiterite SnO<sub>2</sub> (JCPDS card No. 41-1445). The size and morphology of the as prepared SnO<sub>2</sub> nanoparticles precursor were investigated by SEM (Figure S1b) and TEM (Figure S1c).

## **Sn-C composite characterization**

**Figure S2.** (a) XRD pattern, (b) Raman spectrum, (c) SEM image, (d) TEM image of the Sn-C composite.

Figure S2a show the XRD pattern of the Sn-C composite. All the identified diffraction peaks can be assigned to the body-centered cubic (bcc) Sn (JCPDS card No.86-2265). Raman spectra (Figure S2b) confirmed the presence of carbon in the sample as two peaks locating at 1305 and 1580 cm<sup>-1</sup> are detected for the characteristic D-band and G-band of graphite, which originate from disordered and ordered graphitic carbon, respectively. The morphology of the as prepared Sn-C composite was investigated by SEM (Figure S2c) and TEM (Figure S2d).

**Figure S3.** (a) bright-field STEM image of SnSb-C composite after 120 charge/discharge cycles at  $100 \text{ mA g}^{-1}$ , (b-d) EDX maps of Sn, Sb, and C, respectively;

**Figure S4** AC impedance of the electrodes composed of SnSb-C and Sn-C composite.

**Table. S1** Comparison of SnSb-C (this work) and various reported SnSb-C or SnSb-graphene composites.

| <b>Material</b>                                                      | <b>Reversible capacity/mAh g<sup>-1</sup></b> | <b>Rate (mA g<sup>-1</sup>)</b> | <b>Initial efficiency</b> | <b>Ref.</b>      |
|----------------------------------------------------------------------|-----------------------------------------------|---------------------------------|---------------------------|------------------|
| <b>SnSb-C composite</b>                                              | <b>672.2/120th cycles</b>                     | <b>100</b>                      | <b>71%</b>                | <b>This work</b> |
| <b>SnSb/carbon nanotube</b>                                          | <b>860/40th cycles</b>                        | <b>1C</b>                       | <b>79%</b>                | <b>[35]</b>      |
| <b>Porous SnSb/C nanocomposites</b>                                  | <b>420/50th cycles</b>                        | <b>100</b>                      | <b>65%</b>                | <b>[33]</b>      |
| <b>Graphene supported Sn-Sb@carbon core-shell particles</b>          | <b>896/30th cycles</b>                        | <b>80</b>                       | <b>65.3%</b>              | <b>[32]</b>      |
| <b>Sn/SnSb negative electrodes</b>                                   | <b>560 /40th cycles</b>                       | <b>200</b>                      | <b>52%</b>                | <b>[38]</b>      |
| <b>Nanosized SnSb Alloy</b>                                          | <b>500/35th cycles</b>                        | <b>--</b>                       | <b>70%</b>                | <b>[22]</b>      |
| <b>SnSb/Carbon Nanotube</b>                                          | <b>480/50th cycles</b>                        | <b>100</b>                      | <b>48.3%</b>              | <b>[23]</b>      |
| <b>SnSb/MCMB/carbon core-shell composite</b>                         | <b>422.5/100th cycles</b>                     | <b>100</b>                      | <b>83%</b>                | <b>[36]</b>      |
| <b>SnSb nanoparticles into hollow carbon nanofibers</b>              | <b>659/150th cycles</b>                       | <b>50</b>                       | <b>66%</b>                | <b>[37]</b>      |
| <b>Nanostructured SnSb/MO<sub>x</sub> (M= Al or Mg)/C composites</b> | <b>498/150th cycles</b>                       | <b>100</b>                      | <b>77.3%</b>              | <b>[41]</b>      |
| <b>SnSb/C nanocomposite</b>                                          | <b>550/300th cycles</b>                       | <b>100</b>                      | <b>45%</b>                | <b>[39]</b>      |
